# Supplementary material for: Transplantation of Skeletal Muscle-Derived Sca-1+/PW1+/Pax7− Interstitial Cells (PICs) Improves Cardiac Function and Attenuates Remodeling in Mice Subjected to Myocardial Infarction
Source: MDPI journal article supplement (doi:10.3390/cells11244050), 2022-12-14
Supplement: s1 [file s1]

| Media                | Components                                                                                                                                                                                                                                                                                                                                                                                                                |
|----------------------|---------------------------------------------------------------------------------------------------------------------------------------------------------------------------------------------------------------------------------------------------------------------------------------------------------------------------------------------------------------------------------------------------------------------------|
| <b>Growth Media</b>  | 100ml DMEM/F12 (Sigma), 1ml ITS (Life Technologies),<br>100ml Neurobasal Medium (Life Technologies), 1ml<br>Glutamax (Life Technologies), 2ml B27 (Life<br>Technologies), 1ml N2 (Life Technologies), 44µl EGF<br>(Peprotech), 22µl bFGF (Peprotech), 22ml ESCQ-FBS<br>(Life Technologies), 10ng/ml LIF (Millipore) 1ml<br>PenStrep (Life Technologies), 100µl Fungizone (Life<br>Technologies), 100µl Gentamicin (Sigma) |
| <b>Passage Media</b> | 177.6ml DMEM/F12 (Sigma), 20ml ESCQ-FBS, 2ml<br>PenStrep (Life Technologies), 200µl Gentamicin<br>(Sigma), 200µl Fungizone (Life Technologies)                                                                                                                                                                                                                                                                            |

**Supplementary Table S1.** Cell culture maintenance and passage media

| Antibody                           | Source                   | Dilution | Incubation time | Temperature |
|------------------------------------|--------------------------|----------|-----------------|-------------|
| <b>Primary antibody</b>            |                          |          |                 |             |
| anti-BrdU                          | Abcam ab1893             | 1:500    | 1 hour          | RT          |
| anti-WGA                           | Thermo Fisher W11261     | 1:500    | 1 hour          | RT          |
| anti-GFP                           | Rockland 32778           | 1:500    | 1 hour          | RT          |
| Anti-actin- $\alpha$ -sarcomere    | Sigma A2172              | 1:1000   | 1 hour          | RT          |
| Anti-calponin                      | Abcam ab46794            | 1:500    | 1 hour          | RT          |
| Anti-vWF                           | Abcam ab7356             | 1:500    | 1 hour          | RT          |
| Anti-CC3                           | Cell Signalling asp165   | 1:200    | 1 hour          | RT          |
| <b>Secondary Antibody</b>          |                          |          |                 |             |
| Alexa Fluor 633 donkey anti-goat   | Life Technologies a21082 | 1:500    | 1 hour          | RT          |
| Alexa Fluor 594 donkey anti-goat   | Life Technologies a11058 | 1:500    | 1 hour          | RT          |
| Alexa Fluor 488 donkey anti-goat   | Life Technologies a11055 | 1:500    | 1 hour          | RT          |
| Alexa Fluor 594 donkey anti-mouse  | Life Technologies a21203 | 1:500    | 1 hour          | RT          |
| Alexa Fluor 594 donkey anti-rabbit | Life Technologies r37119 | 1:500    | 1 hour          | RT          |
| Alexa Fluor 647 donkey anti-rabbit | Life Technologies a31573 | 1:500    | 1 hour          | RT          |

**Supplementary Table S2.** List of primary and secondary antibodies

| Official Full Name                | Alias    | Forward Primer               | Reverse Primer            | Accession Number |
|-----------------------------------|----------|------------------------------|---------------------------|------------------|
| Abhydrolase Domain Containing 15  | Abhd15   | TCCTACTTGGGGGAG<br>TGTGG     | GGCATACCTGCTGA<br>GAGAGAT | NM_026185.4      |
| ADAMTS16                          | ADAMTS16 | GGTCCTTTGCACCCT<br>AGCAT     | CAGGTGTCTGCTGC<br>TCACTG  | NM_172053.3      |
| ADAMTS17                          | ADAMTS17 | GCGAGTCCCTGCTCT<br>ATCAC     | CCGACAGCTGTGCC<br>CG      | NM_001033877.4   |
| Brain-derived neurotrophic factor | BDNF     | ATCCACTGAGCAAAG<br>CCGAA     | CCTGGTGGAAACATT<br>GTGGCT | NM_007540.4      |
| Bone morphogenetic protein 1      | BMP1     | TACAGCCAGGGCAGG<br>AGTAT     | CTTGCTGAGTCGGG<br>TCCTTT  | NM_009755.3      |
| Bone morphogenetic protein 2      | BMP2     | ACTGCGGTCTCCTAA<br>AGGTCG    | ACCTGGGGAAGCA<br>GCAACAC  | NM_007553.3      |
| Bone morphogenetic protein 4      | BMP4     | GCAACCCAGCCTGAG<br>TATCT     | ATGGCTCCATTGGT<br>TCCTGC  | NM_007554.3      |
| Bone morphogenetic protein 6      | BMP6     | GGCTCCGGTTCTTCA<br>GACTA     | TGGCATT CATGTGT<br>GCGTTG | NM_007556.3      |
| Bone morphogenetic protein 8b     | BMP8b    | TGATGATGGCCACGG<br>TTCTC     | AATGACAGAGTCCA<br>GCCAGC  | NM_007559.5      |
| Bone morphogenetic protein 10     | BMP10    | AGCTTCAAGAACGAA<br>GATCTGTTT | TTTTACGGTCCACG<br>CCATCA  | NM_009756.3      |
| Crim1                             | Crim1    | GGATCGAAGAAGAGA<br>AGCCAGA   | GGTAAAGGACAGCA<br>CTCCCC  | NM_015800.3      |
| Connective tissue growth factor   | Ctgf     | AGAACTGTGTACGGA<br>GCGTG     | GTGCACCATCTTTG<br>GCAGTG  | NM_010217.2      |
| CCL2                              | CCL2     | AGCTGTAGTTTTTGTC<br>ACCAAGC  | GTGCTGAAGACCTT<br>AGGGCA  | NM_011333.3      |
| Cardiotrophin1                    | CTF1     | AGAGGGAGGGAAGTC<br>TGGAAGA   | TTGGCCTCCAAATG<br>GGGTAG  | NM_007795.1      |
| chemokine (C-X-C motif) ligand 1  | CXCL1    | ACCGAAGTCATAGCC<br>AACTC     | CTCCGTTACTTGGG<br>GACACC  | NM_008176.3      |
| chemokine (C-X-C motif) ligand 9  | CXCL9    | TGTGGAGTTCGAGGA<br>ACCCT     | AGTCCGGATCTAGG<br>CAGGTT  | NM_008599.4      |
| chemokine (C-X3-C motif) ligand 1 | CX3CL1   | GCGACAAGATGACCT<br>CACGA     | TGTCGTCTCCAGGA<br>CAATGG  | NM_009142.3      |
| CX3CR1                            | CX3CR1   | CCATCTGCTCAGGAC<br>CTCAC     | CACCAGACCGAACG<br>TGAAGA  | NM_009987.4      |

**Supplementary Table S3.** List of primers used

| Official Full Name                         | Alias | Forward Primer             | Reverse Primer              | Accession Number   |
|--------------------------------------------|-------|----------------------------|-----------------------------|--------------------|
| dickkopf WNT signaling pathway inhibitor 1 | Dkk1  | GACAACTACCAGCCCT<br>ACCC   | GATCTGTACACCT<br>CCGACGC    | NM_010051.3        |
| Epidermal growth factor                    | EGF   | AGGATCCTGACCCCGA<br>ACTT   | ACAGCCGTGATTC<br>TGAGTGG    | NM_010113.4        |
| Acidic fibroblast growth factor            | FGF1  | TTATACGGCTCGCAGA<br>CACC   | TCTCCGCATGCTT<br>CTTGGAG    | NM_010197.3        |
| Fibroblast growth factor 2 (basic)         | FGF2  | GGCTGCTGGCTTCTAA<br>GTGT   | GTCCCGTTTTTGA<br>TCCGAGT    | NM_008006.2        |
| Fibroblast growth factor 7                 | FGF7  | GAGAGGCTCAAGTTGC<br>ACGA   | CGGTTGCTCCTTG<br>ACTTTTGT   | NM_008008.4        |
| Fibroblast growth factor 9                 | FGF9  | GCAGTCACGGACTTGG<br>ATCA   | AATTCCAGAATGC<br>CGAAGCG    | NM_013518.4        |
| Fibroblast growth factor 23                | FGF23 | GGCACTGCTAGAGCCT<br>ATCC   | TCAGGGCACTGTA<br>GATGGTC    | NM_022657.4        |
| Follistatin                                | Fst   | CTGAGAAAGGCCACCT<br>GCTT   | TCTTCACAGGACT<br>TTGCTTTGAT | NM_00130137<br>3.1 |
| Growth differentiation factor 2            | GDF2  | GCTTCAGCGTGGAAGA<br>TGCTA  | GGCAGGAGACAT<br>AGAGTCGG    | NM_019506.4        |
| Growth differentiation factor 5            | GDF5  | AAAGGGCAAGATGACC<br>GAGG   | TAAGATCCGCAGT<br>TCAGCCC    | NM_008109.3        |
| Growth differentiation factor 9            | GDF9  | CAACCAGGTGACAGGA<br>CCG    | AGCAAGTGTTCCA<br>TGGCAGT    | NM_008110.2        |
| Growth differentiation factor 10           | GDF10 | GCAGACATCGGGTGGA<br>ATGA   | ATGGGCGGACAAT<br>CTTGGG     | NM_145741.3        |
| Growth differentiation factor 11           | GDF11 | GAGGGGCTGCATCCTT<br>TCAT   | GGAGCAGTAGTT<br>GGCCTTGT    | NM_010272.2        |
| Growth differentiation factor 15           | GDF15 | TCCAGAGGTGAGATTG<br>GGGT   | GCTTCAGGGGCC<br>TAGTGATG    | NM_011819.3        |
| Glial cell-derived neurotrophic factor     | GDNF  | ACCAGTGACTCCAATAT<br>GCCTG | GCTGCCGCTTGTT<br>TATCTGG    | NM_010275.3        |

**Supplementary Table S3 continued.** List of primers used

| Official Full Name                     | Alias | Forward Primer             | Reverse Primer              | Accession Number   |
|----------------------------------------|-------|----------------------------|-----------------------------|--------------------|
| Granulin                               | Grn   | CTGCCCCGTTCTCTA<br>AGGGTG  | ATCCCCACGAACCAT<br>CAACC    | NM_008175.<br>4    |
| Glucose-6-phosphate isomerase          | Gpi1  | TGTCTACGAACACG<br>GCCAAA   | AGTCCAATGGCTGA<br>CCACAG    | NM_008155.<br>4    |
| Hepatoma-derived growth factor         | HDGF  | AAACTTGGGCTCG<br>CGCTTC    | GGCATCTCATCAATC<br>CGGGC    | NM_008231.<br>4    |
| Hepatocyte growth factor-like          | HGF   | TGCTCCTCCCTTCC<br>CTACTC   | CCGGGCTGAAAGAA<br>TCAAAGC   | NM_0012894<br>58.1 |
| Heparin-binding EGF-like growth factor | Hbegf | GCATCCAAAGTGAT<br>CGCTGC   | GACAACACTGCGGC<br>CAGAAA    | NM_010415.<br>2    |
| Interleukin 1, alpha                   | IL1a  | GCTTGAGTCGGCA<br>AAGAAATCA | AGATGGTCAATGGCA<br>GAACTGT  | NM_010554.<br>4    |
| Interleukin 1, beta                    | IL1b  | TGCCACCTTTTGAC<br>AGTGATG  | TGATGTGCTGCTGC<br>GAGATT    | NM_008361.<br>4    |
| Interleukin 6                          | IL6   | CTCTGCAAGAGAC<br>TTCCATCCA | GACAGGTCTGTTGG<br>GAGTGG    | NM_031168.2        |
| Interleukin 10                         | IL10  | GGCGCTGTCATCG<br>ATTTCTC   | ATGGCCTTGTAGACA<br>CCTTGG   | NM_010548.<br>2    |
| Interleukin-33                         | IL33  | GGCTCACTGCAGG<br>AAAGTACA  | TTGGTCTTCTGTTGG<br>GATCTTCT | NM_0011647<br>24.2 |
| Insulin-like growth factor 1           | IGF1  | TCTGCCTCTGTGAC<br>TTCTTGA  | TAGCCTGTGGGCTT<br>GTTGAA    | NM_010512.<br>5    |
| Insulin-like growth factor 2           | IGF2  | AAAAGCCATCTCCC<br>CGTTCT   | GGATCCCCATTGGTA<br>CCTGG    | NM_010514.<br>3    |
| Inhibin, alpha                         | INHA  | AGCAATGGATGGG<br>GAAGGTG   | GTGGCACCTGTAGC<br>TGGG      | NM_010564.<br>5    |
| Inhibin, beta A                        | INHBA | GCTGCTCAAGTGC<br>CAATACC   | GTTTTGTCAGCCGG<br>CTCTTG    | NM_008380.<br>2    |
| Inhibin, beta B                        | INHBB | TCAGCTTTGCAGA<br>GACAGATGG | CCTTGACCCGTACCT<br>TCCTC    | NM_008381.<br>4    |
| Jagged 1                               | Jag1  | AGCCAAGGTGTGC<br>GGG       | ACGCGGGACTGATA<br>CTCCTT    | NM_013822.<br>5    |
| Jagged 2                               | Jag2  | GGGTGGCAACTCC<br>TTCTACC   | AGCTCCTCATCTGGA<br>GTGGT    | NM_010588.<br>2    |
| latent TGF-beta binding protein        | Ltbp1 | CCCGAAGTGGTAA<br>CAGCACC   | GCACAGGAGGGGAT<br>GTCTTTT   | NM_019919.<br>4    |
| Leukemia inhibitory factor             | LIF   | ACAAGTGTGCAGA<br>CTGTGGA   | CAGTAAGGGCACAAT<br>CCCTGC   | NM_008501.<br>2    |
| Myostatin                              | Mstn  | GAGCCCAGGCACT<br>GGTATTT   | AGGGATTGAGCCCAT<br>CTTCTC   | NM_010834.<br>3    |
| macrophage migration inhibitory factor | MIF   | CTTTGTACCGTCCT<br>CCGGTC   | GTGCACTGCGATGTA<br>CTGTG    | NM_010798.<br>2    |

**Supplementary Table S3 continued.** List of primers used

| Official Full Name                       | Alias | Forward Primer                | Reverse Primer              | Accession Number   |
|------------------------------------------|-------|-------------------------------|-----------------------------|--------------------|
| Noggin                                   | Nog   | GAGGAGGGAAAA<br>GGCTCGTC      | CGGGCATCCGAGAT<br>TACTCC    | NM_008711.<br>2    |
| nephroblastoma overexpressed gene        | Nov   | GAGTGCTGCGAAA<br>AGTGGAC      | CTATAGGCTGGAAG<br>GGCCAAG   | NM_010930.<br>4    |
| Neuregulin-1                             | Nrg1  | TCATAGTGAAAGG<br>TATGTATCAGCC | GGAGACATTTCCGA<br>AGGGGG    | NM_178591.<br>2    |
| Neuregulin-2                             | Nrg2  | GCCAGATCCTAAG<br>CAAAGGC      | TCTGCCGGAGATGA<br>TGATGC    | NM_0011678<br>91.1 |
| Neuregulin 3                             | Nrg3  | GATCCAACAGACC<br>ACTTGGGG     | AATGCTGCACAGAA<br>CATGCC    | NM_008734.<br>3    |
| Neurotrophin 3                           | Ntf3  | CTGATCGGATCCG<br>GAGGAAG      | CCGCAGCCACTCAT<br>CATTATC   | NM_0011640<br>34.1 |
| Periostin                                | Postn | CTGCTTCAGGGAG<br>ACACACC      | TCTGAAGTCAGTGT<br>GGTGGC    | NM_015784.<br>3    |
| Platelet-derived growth factor subunit A | PDGFa | GAGGAGGAGACA<br>GATGTGAGG     | AGGAGAACAAGAC<br>CGCACG     | NM_008808.<br>3    |
| Platelet-derived growth factor C         | PDGFc | AAGGAACAGAACG<br>GAGTGCAAG    | TGAGGAAACTTCGG<br>GCTGTG    | NM_019971.<br>3    |
| Platelet-derived growth factor D         | PDGFd | CAACCTCAGGAGA<br>GATGAGAGC    | TTTTCTCCTGGGAA<br>CGGAGC    | NM_027924.<br>3    |
| placental growth factor                  | PGF   | GACGAGCATGGTG<br>ATTGTGC      | AGGCACCACTTCCA<br>CTTCTG    | NM_008827.<br>3    |
| Kit ligand                               | SCF   | TTACCTTCGCACA<br>GTGGCTG      | TCATCCACACAAGG<br>TCACGG    | NM_013598.<br>3    |
| secreted phosphoprotein 1                | SPP1  | CTGGCAGCTCAGA<br>GGAGAAG      | CAGCATTCTGTGGC<br>GCAAG     | NM_0012042<br>01.1 |
| Secreted frizzled related protein 1      | SFRP1 | CAAGCGAGTTTGC<br>ACTGAGG      | AGTTGTGGCTGAGG<br>TTGTCC    | NM_013834.<br>3    |
| TIMP metalloproteinase inhibitor 1       | TIMP1 | AGAGACACACCAG<br>AGCAGATACC   | TGGTCTCGTTGATTT<br>CTGGGG   | NM_0010443<br>84.1 |
| TIMP metalloproteinase inhibitor 2       | TIMP2 | CAAAGCAGTGAGC<br>GAGAAGG      | TGTCAGGTCCTTTG<br>AACATCTTT | NM_011594.<br>3    |
| Transforming growth factor, beta 1       | TGFB1 | CCCGAAGCGGACT<br>ACTATGC      | CATAGATGGCGTTG<br>TTGCGG    | NM_011577.<br>2    |
| Transforming growth factor, beta 2       | TGFB2 | TCCCCTCCGAAAA<br>TGCCATC      | ACTCTGCCTTCACC<br>AGATTCCG  | NM_009367.<br>4    |
| Transforming growth factor, beta 3       | TGFB3 | GCACTTTACAACA<br>GCACCCG      | CAGACGGCCAGTTC<br>ATTGTG    | NM_009368.<br>3    |

**Supplementary Table S3 continued.** List of primers used

| Official Full Name                                     | Alias   | Forward Primer              | Reverse Primer            | Accession Number   |
|--------------------------------------------------------|---------|-----------------------------|---------------------------|--------------------|
| thyroid hormone receptor interactor 6                  | Trip6   | GCTGTTACAAGTG<br>TGAGGAGTG  | AGAGCTCTTGGATA<br>CGCCAG  | NM_011639.<br>3    |
| thymidine phosphorylase                                | Tymp    | TGAATAGACTGGA<br>GCAATGGCAG | GCCCCAATTTGTGT<br>GTCCTG  | NM_138302.<br>2    |
| Vascular endothelial growth factor A                   | Vegfa   | CTTGCAGATGTGA<br>CAAGCCAA   | TCAACGGTGACGAT<br>GATGGC  | NM_001025<br>250.3 |
| Vascular endothelial growth factor D                   | Vegfd   | GTTGTAAGTGCTT<br>GCCACG     | GAGTGGTCTTCTGT<br>CCCAGG  | NM_010216.<br>2    |
| wingless-type MMTV integration site family, member 1   | Wnt1    | GCAACCACAGTCG<br>TCAGAAC    | G TTCACGATGCCCC<br>ACCATC | NM_021279.<br>4    |
| wingless-type MMTV integration site family, member 3A  | Wnt3a   | TGGCTCCTCTCGG<br>ATACCTC    | AGCCAAGGACCACC<br>AGATCG  | NM_009522.<br>2    |
| wingless-type MMTV integration site family, member 5A  | Wnt5a   | CGCTTCGCTTGAA<br>TTCCTCG    | CAATGGGCTTCTTC<br>ATGGCG  | NM_009524.<br>4    |
| wingless-type MMTV integration site family, member 7A  | Wnt7a   | GGGACTATGACCC<br>GGAAAGC    | CGAAGAGAAGCCAC<br>CGATCC  | NM_009527.<br>3    |
| wingless-type MMTV integration site family, member 10A | Wnt10a  | AGATCGCCATCCA<br>TGAGTGC    | ACTCTCTCGAAAAC<br>CTCGGC  | NM_009518.<br>2    |
| Actin, beta                                            | B-Actin | GATCAAGATCATTG<br>CTCCTCCTG | ACGCAGCTCAGTAA<br>CAGTCC  | NM_007393.<br>5    |
| Beta-2-microglobulin                                   | B2M     | GGCTCACACTGAA<br>TTCACCC    | TGTCTCGATCCCAG<br>TAGACGG | NM_009735.<br>3    |
| Glyceraldehyde-3-phosphate dehydrogenase               | GAPDH   | GAGAGTGTTCCT<br>CGTCCCG     | ATGAAGGGGTCGTT<br>GATGGC  | NM_0012897<br>26.1 |

**Supplementary Table S3 continued.** List of primers used

|                |          | Sham n=8   | MI-PBS n=7  | MI-PICs n=7  |
|----------------|----------|------------|-------------|--------------|
| IVS,d<br>(mm)  | Baseline | 0.85±0.05  | 0.72±0.01   | 0.76±0.04    |
|                | Week 1   | 0.90±0.05  | 0.51±0.04*  | 0.58±0.02*   |
|                | Week 3   | 0.88±0.10  | 0.50±0.07*  | 0.67±0.04*   |
|                | Week 6   | 0.95±0.06  | 0.44±0.03*  | 0.57±0.08*   |
| IVS,s<br>(mm)  | Baseline | 1.31 ±0.11 | 1.35 ±0.18  | 1.15±0.05    |
|                | Week 1   | 1.35 ±0.12 | 0.74 ±0.09* | 0.77 ±0.03*  |
|                | Week 3   | 1.40 ±0.08 | 0.68 ±0.11* | 0.88 ±0.09*  |
|                | Week 6   | 1.30 ±0.08 | 0.66 ±0.06* | 0.80 ±0.13*  |
| LVID,d<br>(mm) | Baseline | 3.75 ±0.09 | 3.70 ±0.12  | 3.87±0.13    |
|                | Week 1   | 3.88 ±0.14 | 5.32 ±0.22* | 4.59 ±0.24*  |
|                | Week 3   | 4.18 ±0.19 | 4.99 ±0.31* | 4.07 ±0.17*  |
|                | Week 6   | 3.95 ±0.17 | 5.02 ±0.34* | 3.63 ±0.25#  |
| LVID,s<br>(mm) | Baseline | 2.42 ±0.07 | 2.23 ±0.15  | 2.53 ±0.15   |
|                | Week 1   | 2.56 ±0.12 | 4.71 ±0.21* | 3.65 ±0.28*  |
|                | Week 3   | 2.54 ±0.10 | 4.39 ±0.36* | 3.46 ±0.10*  |
|                | Week 6   | 2.55 ±0.12 | 4.44 ±0.31* | 3.49 ±0.31*# |

**Supplementary Table S4.** Echocardiography parameters measured

at baseline, weeks 1, 3 and 6. Data expressed as means ± sem

\*<0.05 vs. sham, #<0.05 vs MI-PBS. Interventricular septum; IVS,

left ventricle inner dimension; LVID at diastole; d and systole; s



|                       |          | Sham n=8   | MI-PBS n=7  | MI-PICs n=7  |
|-----------------------|----------|------------|-------------|--------------|
| LVPW,d<br>(mm)        | Baseline | 0.95 ±0.10 | 0.76 ±0.03  | 0.62 ±0.04   |
|                       | Week 1   | 0.85 ±0.05 | 0.68 ±0.12  | 0.61 ±0.08   |
|                       | Week 3   | 0.78 ±0.05 | 0.64 ±0.06  | 0.67 ±0.07   |
|                       | Week 6   | 0.91 ±0.03 | 0.74 ±0.13  | 0.82 ±0.26   |
| LVPW,s<br>(mm)        | Baseline | 1.30 ±0.12 | 1.30 ±0.19  | 1.05 ±0.06   |
|                       | Week 1   | 1.17 ±0.08 | 0.94 ±0.18  | 0.86 ±0.10   |
|                       | Week 3   | 1.18 ±0.05 | 0.89 ±0.13  | 0.84 ±0.06   |
|                       | Week 6   | 1.35 ±0.08 | 0.93 ±0.16* | 0.86 ±0.31*# |
| LVAW,d<br>(mm)        | Baseline | 0.81 ±0.03 | 0.80 ±0.04  | 0.78 ±0.05   |
|                       | Week 1   | 0.83 ±0.04 | 0.61 ±0.09* | 0.59 ±0.03*  |
|                       | Week 3   | 0.82 ±0.05 | 0.67 ±0.06* | 0.66 ±0.06*  |
|                       | Week 6   | 0.85 ±0.06 | 0.44 ±0.03* | 0.59 ±0.15*  |
| LVAW,s<br>(mm)        | Baseline | 1.15 ±0.04 | 1.20 ±0.05  | 1.21 ±0.05   |
|                       | Week 1   | 1.20 ±0.06 | 0.72 ±0.05* | 0.91 ±0.09*  |
|                       | Week 3   | 1.34 ±0.13 | 0.87 ±0.08* | 0.91 ±0.07*  |
|                       | Week 6   | 1.07 ±0.07 | 0.71 ±0.05* | 0.89 ±0.17   |
| LVID trace, d<br>(μl) | Baseline | 64.7±3.1   | 56.3±5.0    | 69.4±5.3     |
|                       | Week 1   | 69.1±7.5   | 143.8±10.4* | 109.1±14.0*  |
|                       | Week 3   | 74.6±8.1   | 127.8±22.9* | 71.7±8.4#    |
|                       | Week 6   | 67.8±9.5   | 118.0±17.1* | 64.3±2.9#    |
| LVID trace, s<br>(μl) | Baseline | 19.9±1.4   | 24.7±8.1    | 23.2±2.5     |
|                       | Week 1   | 21.2±2.3   | 106.2±9.6*  | 61.4±9.5*#   |
|                       | Week 3   | 29.2±4.1   | 90.3±20.1*  | 33.1±3.8#    |
|                       | Week 6   | 25.9±1.8   | 86.6±15.3*  | 31.3.3±2.9#  |

**Supplementary Table S5.** Echocardiography parameters measured at baseline, weeks 1, 3 and 6. Data expressed as means  $\pm$  sem  
\* $<0.05$  vs. sham, # $<0.05$  vs MI-PBS. left ventricle posterior wall; LVPW, left ventricle anterior wall; LVAW, left ventricular internal dimension trace; LVID trace at diastole; d and systole; s.

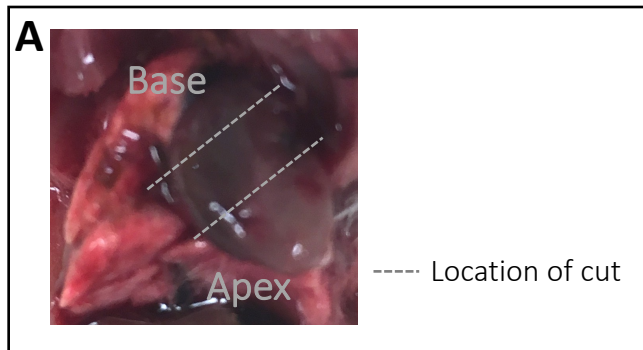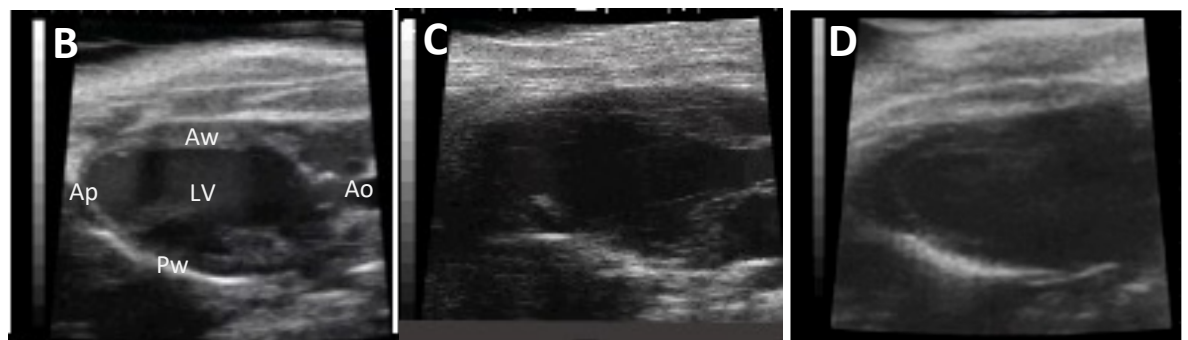

**S.F.1-** Photomicrograph depicting the areas of the heart dissected for ex vivo analysis. Echocardiographic Parasternal long axis images of the left ventricle in sham (B), MI-PBS (C) and MI-PICs (D), Anterior wall; (Aw), Posterior wall; (Pw), Apex; (Ap), Aorta; (Ao) and left ventricle (LV).

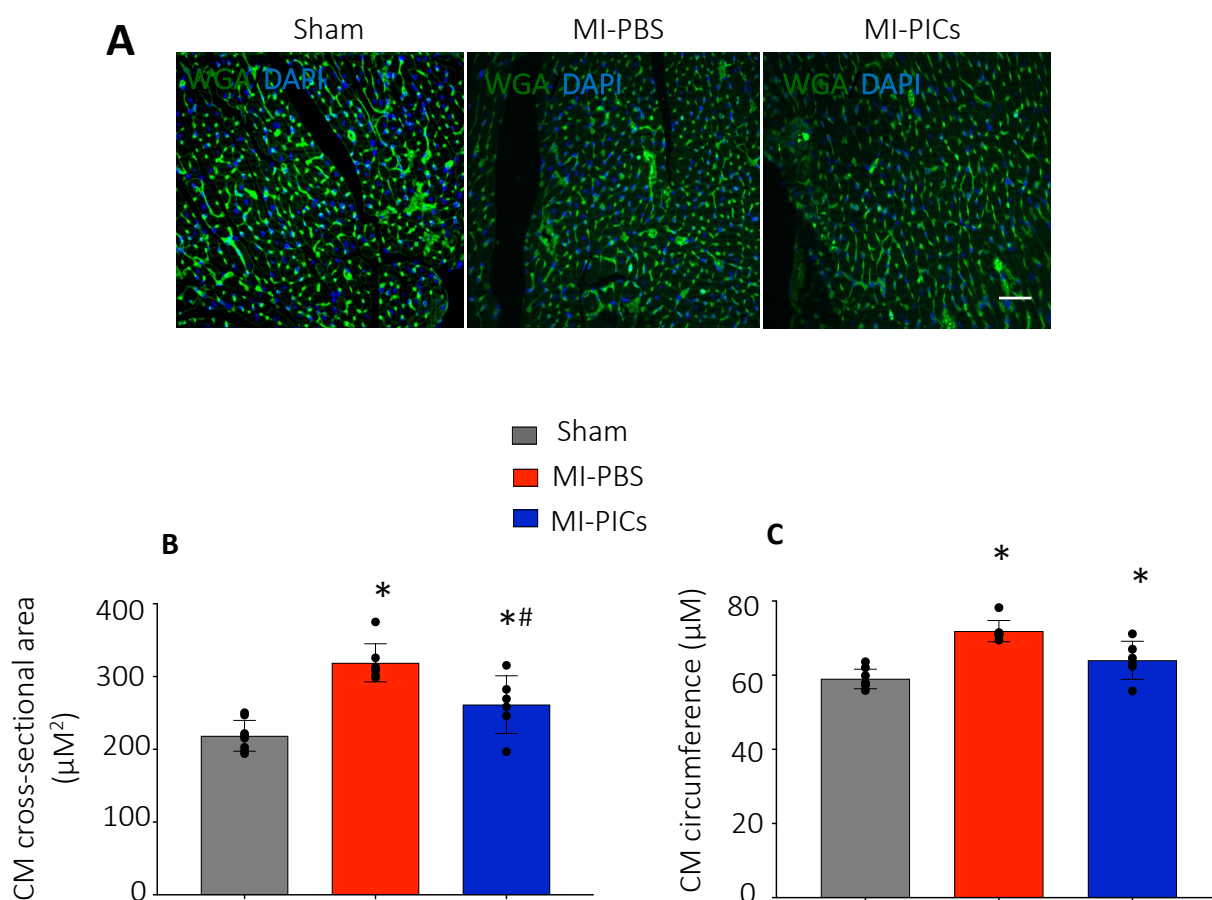

**Supplementary Figure S2. A-** Confocal images depicts hypertrophic cardiomyocytes in the non-RR of sham = 8, MI-PICs = 6 and MI-PBS = 7 groups, scale bar = 500  $\mu\text{M}$ . WGA (green) and DAPI (blue). Measurements of the cross-sectional area, **B** and circumference, **C** of cardiomyocytes in the non-RR of the LV,. Data expressed as means  $\pm$  SD \* $<0.05$  vs. sham, # $<0.05$  vs MI-PBS.

**A**

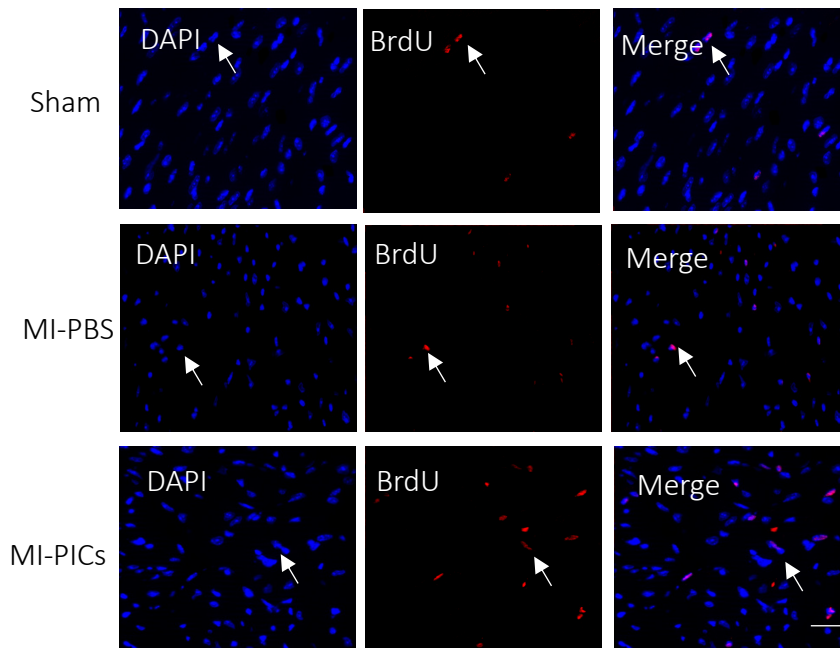

**B**

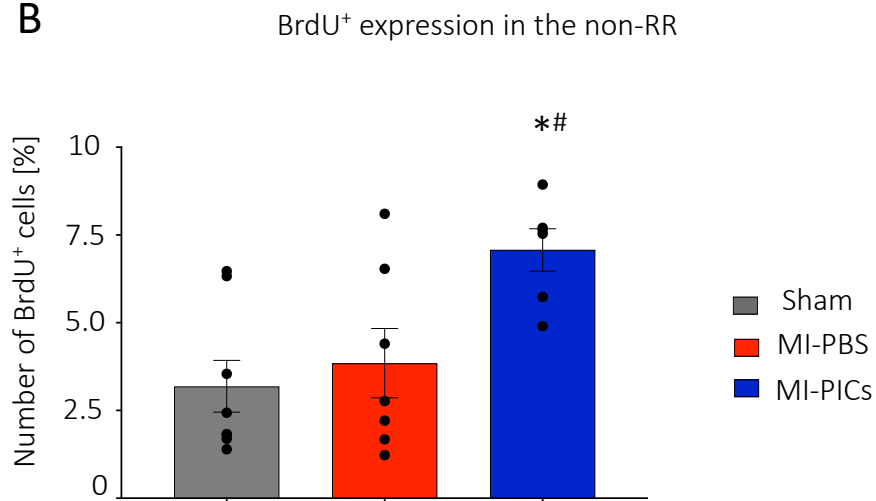

**Supplementary Figure S3.** Representative photomicrographs of the proliferation index in the non-RR of the LV in the sham = 8, MI-PBS = 7 and MI-PICs = 6 groups, Scale bar 10μM **A**. Quantification of the proliferating index in each group **B**, data expressed as means ± sem of the total number of BrdU<sup>(+)</sup> cells over the total number of cells (Dapi), \*<0.05 vs. sham, #<0.05 vs MI-PBS.

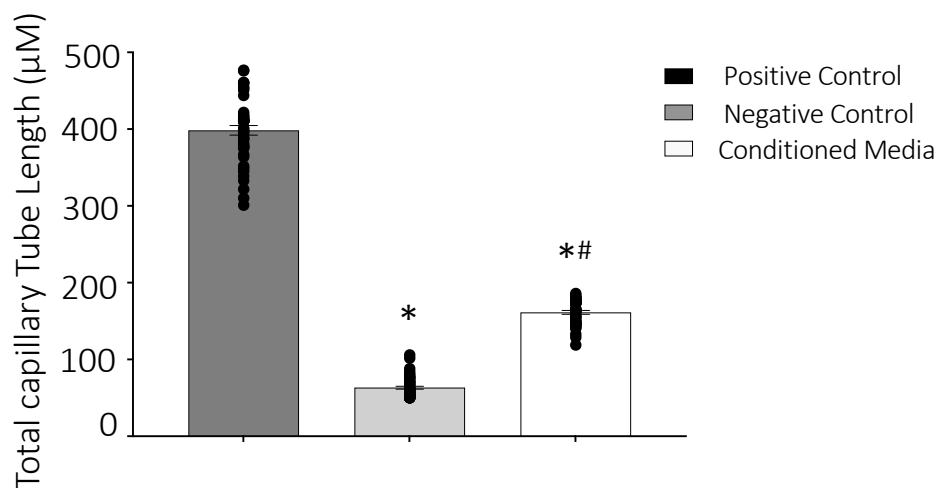

**Supplementary Figure S4.** Total capillary tube length as measured using a Matrigel tube formation assay. HUVECs were exposed for 15 h in 96-well plates coated with Matrigel to HUVEC media (positive control), serum-free DMEM (negative control) or PIC conditioned media. Data are presented as the Mean  $\pm$  SEM. \* $<0.05$  vs. Positive control, # $<0.05$  vs Negative control.
